# Supplementary material
Source: PubMed Central journal article supplement (PMC9021343)
Supplement: 13555_2022_695_MOESM1_ESM.pdf [file 13555_2022_695_MOESM1_ESM.pdf]

## **Supplementary Material**

### **Impact of psoriatic disease on quality of life: Interim results of a global survey**

**Authors:** April Armstrong,<sup>1</sup> Barbra Bohannan,<sup>2</sup> Sicily Mburu,<sup>3</sup> Ivette Alarcon,<sup>4</sup> Torben Kasperek,<sup>4</sup> Jihen Toumi,<sup>5</sup> Susan Frade,<sup>4</sup> Silvia Fernandez Barrio,<sup>6</sup> Matthias Augustin<sup>7</sup>

**Affiliations:** <sup>1</sup> *Department of Dermatology, University of Southern California, Los Angeles, CA, USA;* <sup>2</sup> *Psoriasisförbundet, Sweden;* <sup>3</sup> *International Federation of Psoriasis Associations, Sweden;* <sup>4</sup> *Novartis Pharma AG, Basel, Switzerland;* <sup>5</sup> *Novartis, Middle East FZE;* <sup>6</sup> *Asociación Para En Enfermo De Psoriasis, Argentina;* <sup>7</sup> *University Medical Center Hamburg- Eppendorf, Hamburg, Germany.*

#### **Corresponding author:**

April Armstrong

Department of Dermatology, University of Southern California

Los Angeles, CA, USA

Email: [aprilarmstrong@post.harvard.edu](mailto:aprilarmstrong@post.harvard.edu)

Tel: 424-256-5003

**Fig. S1. Impact of psoriatic disease on emotions (i; top 12 emotions), relationships (ii; top 12) and stigma and discrimination experiences related to psoriatic disease (iii; top 10).**

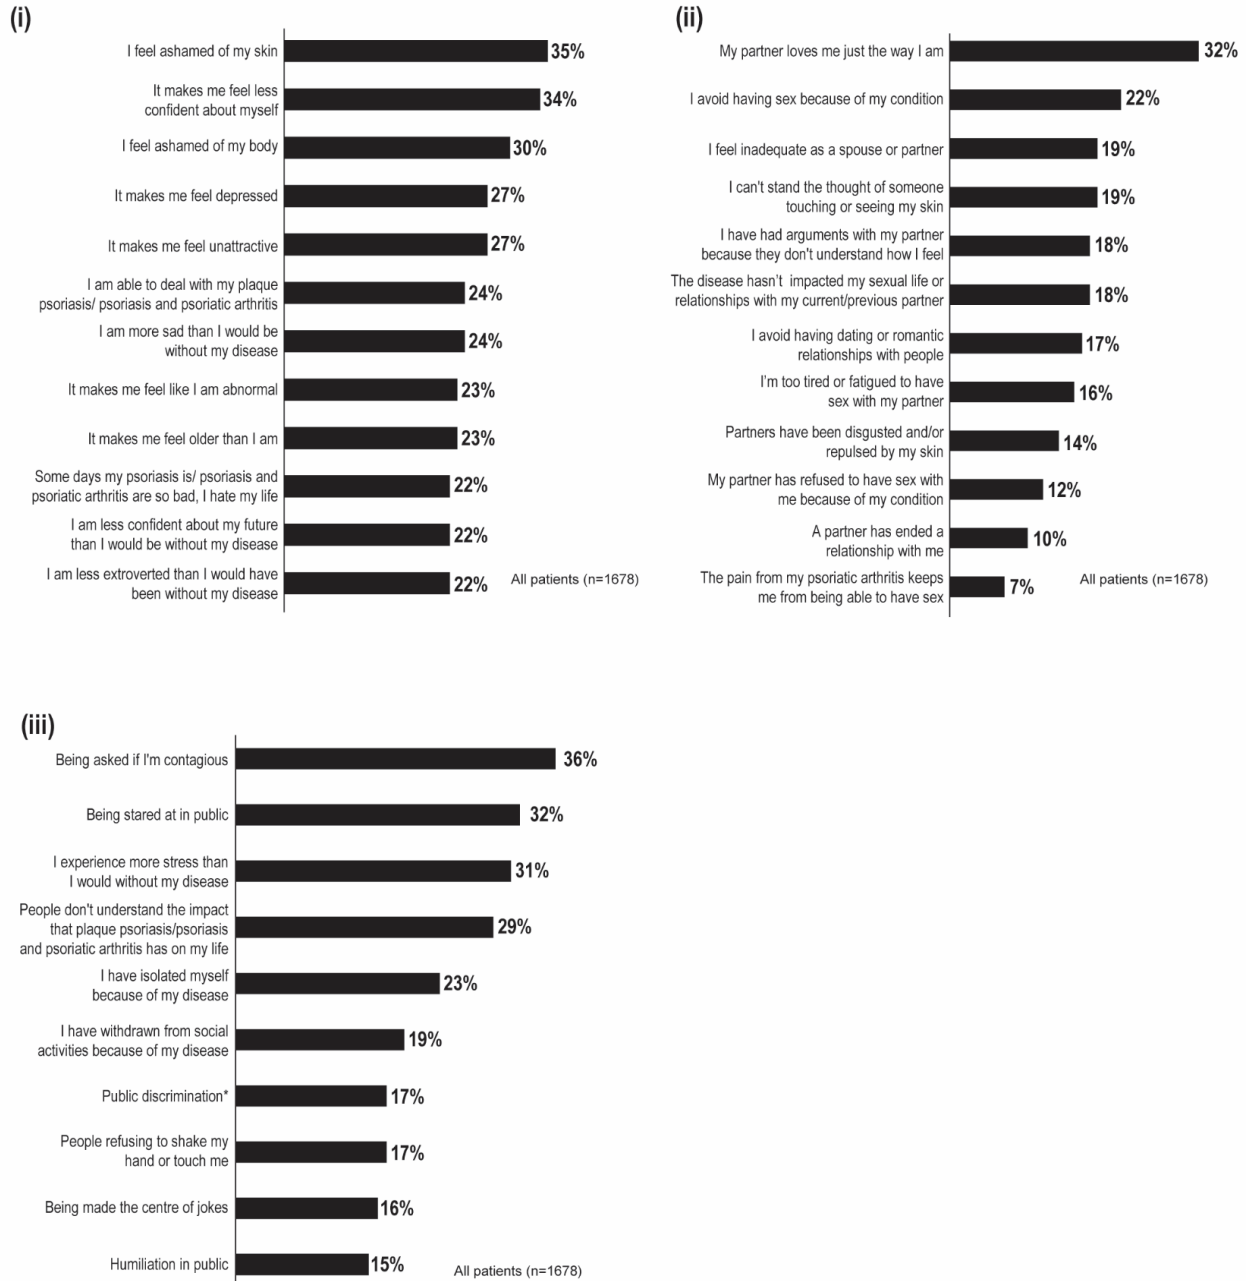

\*(e.g. refusal to provide me a treatment at a beauty clinic/cosmetic studio, people refusing to serve me in shops, and being asked to leave a form of public transport)

**Fig. S2. HCP responsible for diagnosis (i) and currently treating (ii) psoriasis and psoriatic arthritis.**

(i)

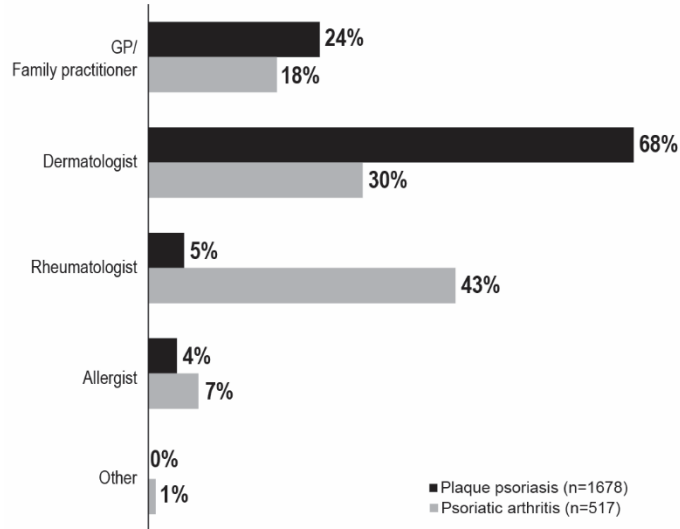

(ii)

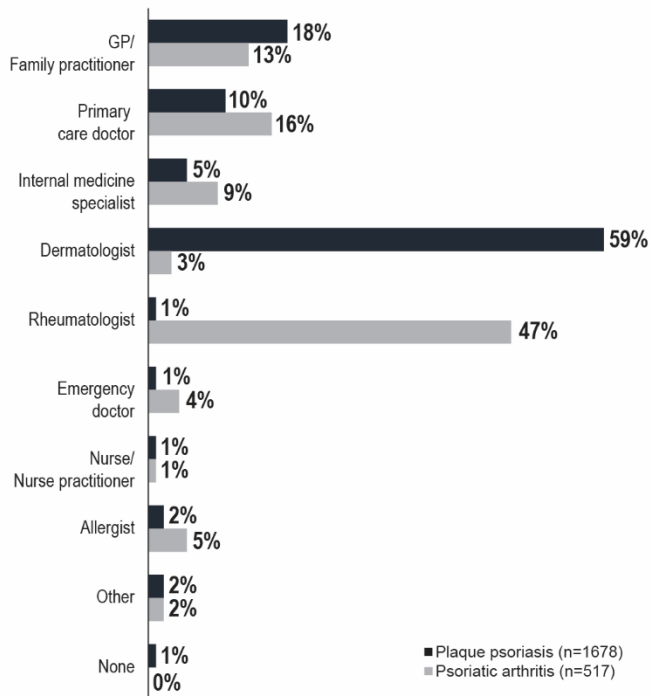

GP, general practitioner; HCP, healthcare professional.
